# Supplementary material for: Hospital-Wide Protocol Significantly Improved Appropriate Management of Patients with Staphylococcus aureus Bloodstream Infection
Source: MDPI journal article supplement (doi:10.3390/antibiotics11060827), 2022-06-20
Supplement: s1 [file s1]

## Supplementary Materials

| Date | Order for one day                                                                                                                                                                                                                                                                                                                                                                                                                                                                                                                                                                                                                                                                                                                                                                                                                                                                                                              | Date                          | Orders for continuation                                                                                                                                                                                                                                                                                                                                                                                                                                                                                                                                                                                                                                                                                                                                                                                                                                                                                                                                                                                                                                                                                                                                                                                                                                                                                                                                                                                                                                                                                                                                                                                                               |
|------|--------------------------------------------------------------------------------------------------------------------------------------------------------------------------------------------------------------------------------------------------------------------------------------------------------------------------------------------------------------------------------------------------------------------------------------------------------------------------------------------------------------------------------------------------------------------------------------------------------------------------------------------------------------------------------------------------------------------------------------------------------------------------------------------------------------------------------------------------------------------------------------------------------------------------------|-------------------------------|---------------------------------------------------------------------------------------------------------------------------------------------------------------------------------------------------------------------------------------------------------------------------------------------------------------------------------------------------------------------------------------------------------------------------------------------------------------------------------------------------------------------------------------------------------------------------------------------------------------------------------------------------------------------------------------------------------------------------------------------------------------------------------------------------------------------------------------------------------------------------------------------------------------------------------------------------------------------------------------------------------------------------------------------------------------------------------------------------------------------------------------------------------------------------------------------------------------------------------------------------------------------------------------------------------------------------------------------------------------------------------------------------------------------------------------------------------------------------------------------------------------------------------------------------------------------------------------------------------------------------------------|
|      | <div style="margin-bottom: 10px;"><input type="checkbox"/> CBC</div> <div style="margin-bottom: 10px;"><input type="checkbox"/> H/C x II specimens or H/C for CRBSI (if presence of C-line) at 72 hrs. after start antibiotics (Date: _____)</div> <div style="margin-bottom: 10px;"><input type="checkbox"/> Consult cardio for echocardiogram ALL case at day 5-7<sup>th</sup> after H/C positive (Date: _____)</div> <div style="margin-bottom: 10px;"><input type="checkbox"/> Remove central venous catheter at Site: _____</div> <div style="margin-bottom: 10px;"><input type="checkbox"/> MRI spine at site _____ IPD urgency if clinical indicated</div> <div style="margin-bottom: 10px;"><input type="checkbox"/> CT whole abdomen IPD urgency if clinical indicated</div> <div style="margin-bottom: 10px;"><input type="checkbox"/> Consult surgery for drainage if presence of any abscess<br/>Site: _____</div> | BW _____<br><u>CrCl</u> _____ | <div style="margin-bottom: 10px;"><u>If pathogen is MSSA</u></div> <div style="margin-bottom: 10px;"> <input type="checkbox"/> No penicillin allergy →<br/> <input type="checkbox"/> Cloxacillin 2 gm IV q 4 hr.         </div> <div style="margin-bottom: 10px;"> <input type="checkbox"/> Mild penicillin allergy → Cefazolin<br/> <input type="checkbox"/> <u>CrCl</u> ≥ 35 : 2 gm IV q 8 hr.<br/> <input type="checkbox"/> <u>CrCl</u> 11-34 : 1 gm IV q 12 hr.<br/> <input type="checkbox"/> <u>CrCl</u> &lt; 10 : 1 gm IV q 24 hr.<br/> <input type="checkbox"/> HD : 2 gm after HD         </div> <div style="margin-bottom: 10px;"> <input type="checkbox"/> Severe penicillin allergy →<br/> <input type="checkbox"/> Vancomycin 20-25 mg/kg (_____ mg) IV loading then _____ mg IV q _____ hr. (Adjust dose based on <u>CrCl</u> and BW)         </div> <div style="margin-bottom: 10px;"><input type="checkbox"/> Vancomycin trough level before dose 4<sup>th</sup> (keep trough level 15-20)</div> <div style="margin-bottom: 10px;"><u>If pathogen is MRSA</u></div> <div style="margin-bottom: 10px;"> <input type="checkbox"/> Vancomycin 20-25 mg/kg (_____ mg) IV loading then _____ mg IV q _____ hr. (Adjust dose based on <u>CrCl</u> and BW)         </div> <div style="margin-bottom: 10px;"><input type="checkbox"/> Vancomycin trough level before dose 4<sup>th</sup> (keep trough level 15-20)</div> <div style="text-align: center; margin-top: 20px;">QR CODE</div> <div style="margin-top: 20px;">           Scan QR code for dose adjustment for vancomycin based on <u>CrCl</u> and BW         </div> |

**Consult ID if patient has any of these conditions**

- ☐ Infective endocarditis
- ☐ Cardiovascular implantable electronic devices (CIED) infection
- ☐ Osteomyelitis
- ☐ Septic arthritis
- ☐ Metastatic infection e.g. deep organ abscess
- ☐ Positive H/C at 72 hrs. after proper antibiotics
- ☐ Persistent fever > 72 hrs. after proper antibiotics
- ☐ Neutropenia

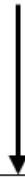

If no any of these conditions  
Duration of antibiotics IV: 14 days after 1<sup>st</sup> H/C negative

**Figure S1. Hospital-Wide management protocol for patients with *Staphylococcus aureus* bloodstream infections.**
